# Supplementary material for: Computational timeline reconstruction of the stories surrounding Trump: Story turbulence, narrative control, and collective chronopathy
Source: PubMed Central journal article supplement (PMC8654215; doi:10.1371/journal.pone.0260592), 2021-12-08
Supplement: pone.0260592.s001.pdf [file pone.0260592.s001.pdf]

$\Omega_1$ : amb('Trump') on 2020/01/06

$\Omega_2$ : amb('Trump') on 2021/01/06

Divergence contribution  $\delta D_{1/4,\tau}^R$  (%)

Instrument: Rank-Turbulence Divergence

$\alpha=1/4$

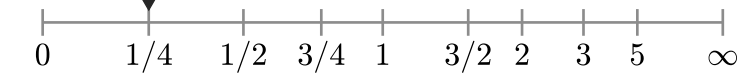

$$D_{1/4}^R(\Omega_1 \parallel \Omega_2) = 0.368$$

$$\propto \sum_{\tau} \left| \frac{1}{r_{\tau,1}^{1/4}} - \frac{1}{r_{\tau,2}^{1/4}} \right|^{4/5}$$

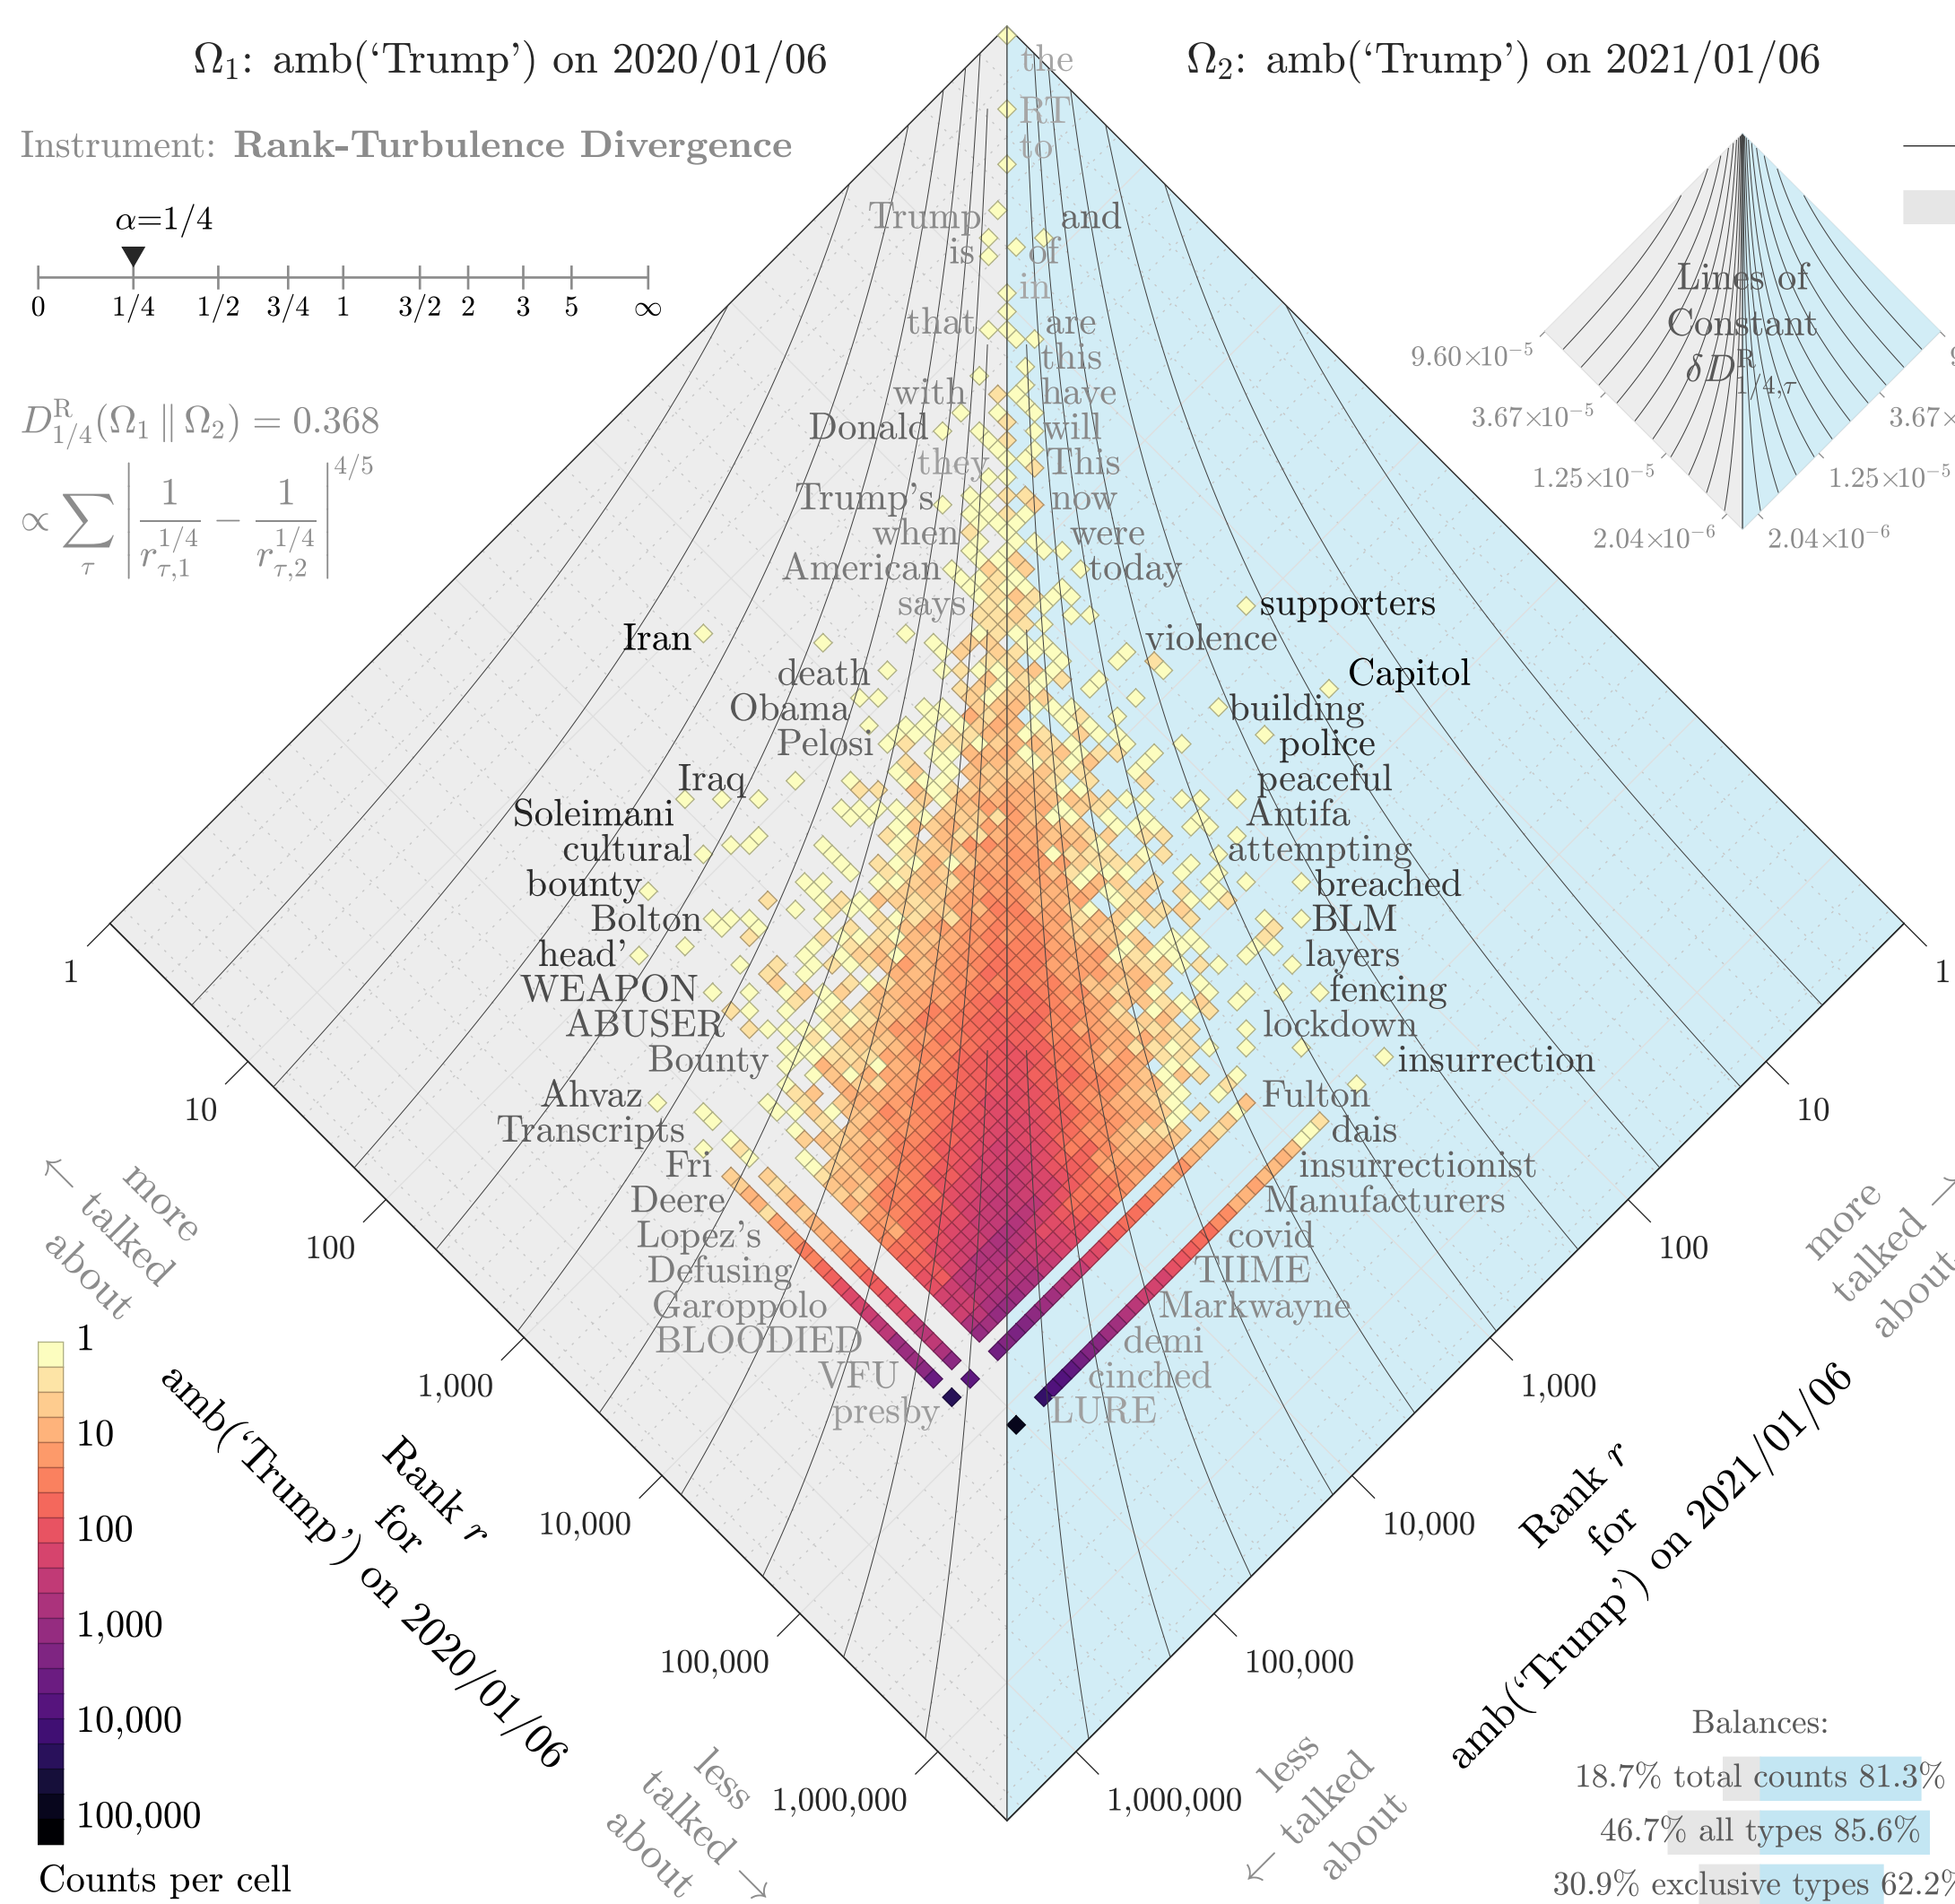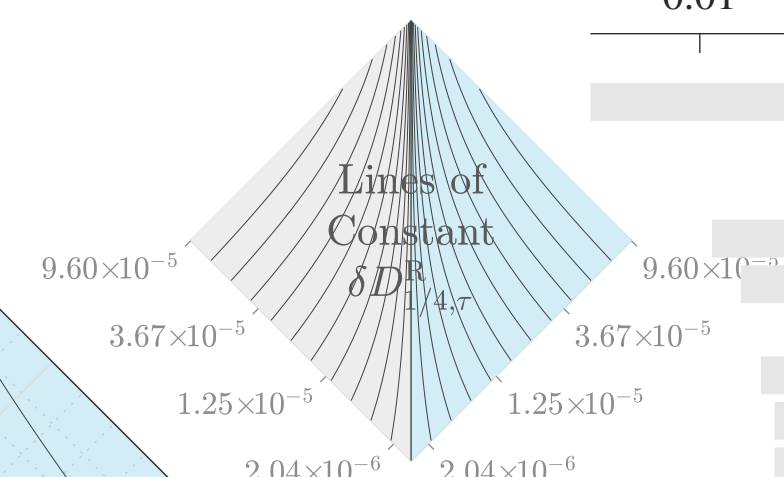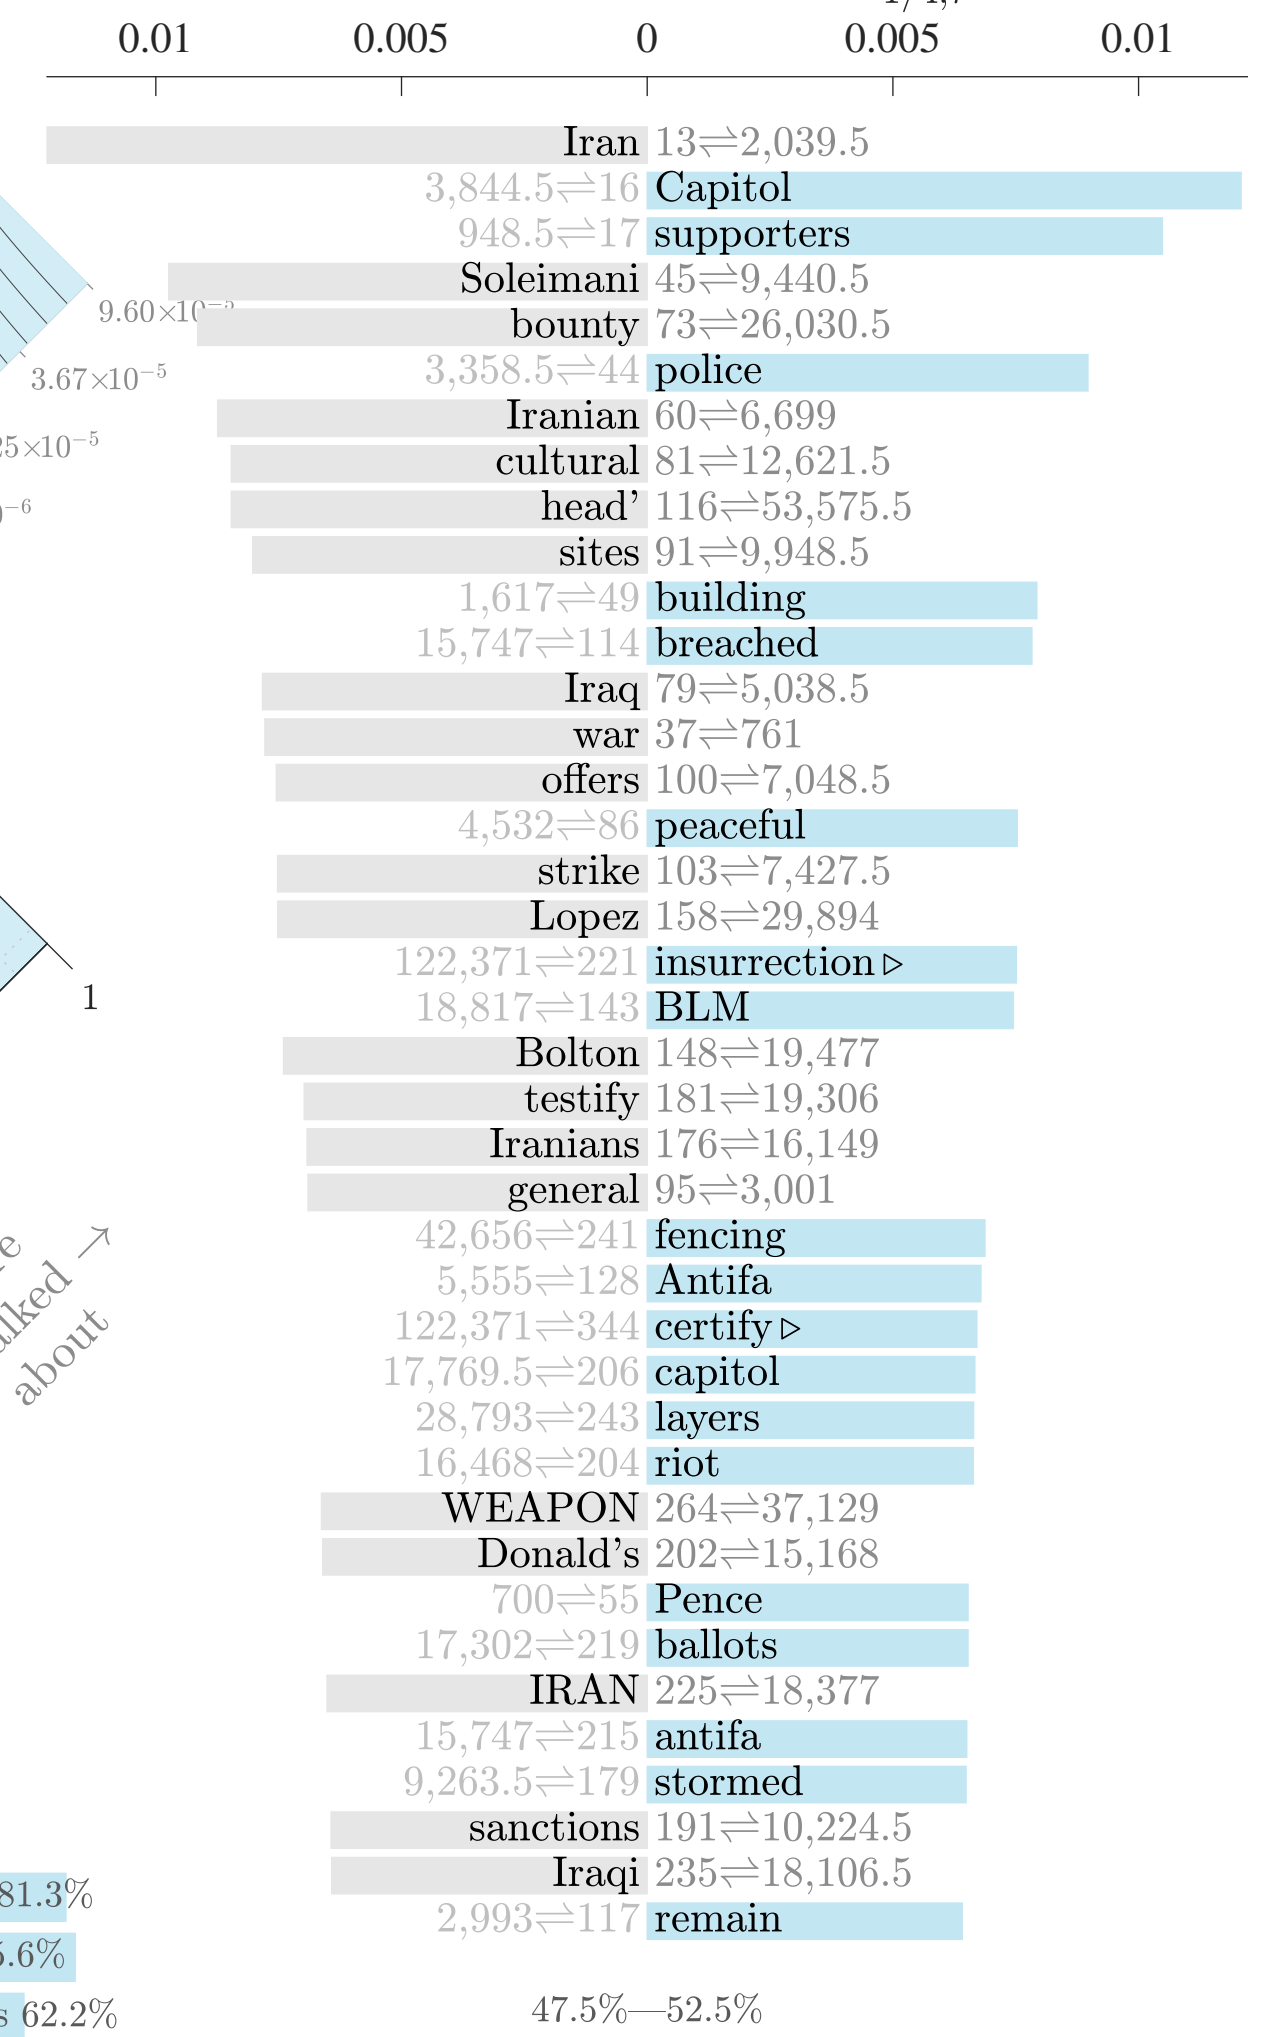

Balances:  
 18.7% total counts 81.3%  
 46.7% all types 85.6%  
 30.9% exclusive types 62.2%

47.5%—52.5%
